# Supplementary material
Source: HighWire-hosted journal article supplement (https://www.qdcxjkg.com/highwire/filestream/114169/field_highwire_adjunct_files/2/ERJ_01681-2013_Pison.pdf)
Supplement: ERJ_01681-2013_Pison.pdf [file ERJ_01681-2013_Pison.pdf]

Avertissement : ce formulaire n'est pas pris en charge par la version actuelle d'Acrobat ou d'Adobe Reader.  
Mise à niveau vers la dernière version pour une prise en charge complète.
